# Supplementary material
Source: PubMed Central journal article supplement (PMC3822433)
Supplement: NIHMS522021-supplement-supplement_1.pdf [file NIHMS522021-supplement-supplement_1.pdf]

1 **Online Supplement:**

2

3 **NHANES:**

4       The National Health and Nutrition Examination Surveys (NHANES) are designed to  
5 assess the health and nutrition of children and adults in the United States. Since 1999, NHANES  
6 has been conducted continuously in 2-year blocks. The survey examines a nationally  
7 representative sample of approximately 5000 individuals from 15 counties across the United  
8 States each year. Interviews are initially conducted in subject's homes, followed by physical  
9 exams in mobile centers. In the 2007-2010 surveys, non-Mexican Hispanics were oversampled in  
10 order to provide sufficient power for subgroup analyses. There was an 80% response rate among  
11 those interviewed, and sample weights were applied to produce an unbiased national estimate.  
12 The NHANES was approved by the IRB of the National Center for Health Statistics, and all  
13 subjects provided informed consent.

14

15 **Methods:**

16 Self-reported food allergy was compared to recent ingestion of milk, fish, shellfish, and peanut.  
17 Thirty-day consumption of foods was asked for milk, shellfish and fish, but not for the other  
18 allergens queried in the food allergy questionnaire. Twenty-four hour consumption of peanut was  
19 extracted from the detailed food diary as outlined below. For milk, subjects were initially asked  
20 the question, "In the past 30 days, how often did you have milk to drink or on your cereal?" If  
21 they answered affirmatively ("rarely," "sometimes," "often," "varied"), they were then asked,  
22 "What type of milk was it?" Subjects were classified as "drinking milk" if they answered yes to  
23 whole milk, 2% milk, 1% milk, or fat free milk. Consumption was then compared to whether the  
24 subject reported a milk allergy in order to determine what percentage of those with self-reported

25 milk allergy were still consuming the food. Shellfish ingestion was similarly ascertained by the  
26 question, “During the past 30 days, did you eat any types of shellfish listed on this card?”  
27 Subjects were included in the analysis of the percentage of individuals with a self-reported  
28 shellfish allergy who were still consuming the food if they answered yes to eating crabs, crayfish,  
29 lobster, or shrimp. For fish, subjects were asked, “During the past 30 days, did you eat any types  
30 of fish listed on this card?” and were included if they endorsed eating breaded fish, tuna, bass,  
31 catfish, cod, flatfish, haddock, mackerel, perch, pike, pollock, porgy, salmon, sardines, sea bass,  
32 shark, swordfish, trout, or walleye. Finally, subjects were interviewed in person to report the type  
33 and amount of food and beverages they consumed 24 hours prior to the interview (midnight to  
34 midnight). Peanut-containing foods were identified in the NHANES list of possible participant  
35 responses. Subjects who recorded eating these peanut-containing foods were identified and  
36 included in the analysis of those with self-reported peanut allergy who were still consuming the  
37 food. Further analyses excluded subjects who reported allergy to a food but also reported  
38 consuming it either in the past 30 days (milk, fish, shellfish) or 24 hours (peanut).

39 Education level was assessed by the following question to the household representative,  
40 “What is the highest grade or level of school you have received?” and was dichotomized as less  
41 than or greater than the median value, which was attending college. Income level was assessed as  
42 a ratio of family income to poverty threshold and was dichotomized as less than or greater  
43 than/equal to the median value of 1.75. The categories of self-reported race/ethnicity were  
44 Mexican American, Other Hispanic, Non-Hispanic White, Non-Hispanic Black, and other race,  
45 including multi-racial. For analyses, Mexican American and Other Hispanic were combined.

46 The presence of asthma was assessed by a positive response to the question, “Has a doctor  
47 or other health professional ever told you that you have asthma?” and allergic rhinitis was a

48 positive response to, “During the past 12 months, have you had an episode of hay fever?” Asthma  
49 severity was further characterized by participant responses to the questions: a) “Do you still have  
50 asthma?” b) “During the past 12 months, have you had an episode of asthma or an asthma  
51 attack?” and c) “During the past 12 months, have you had to visit an emergency room or urgent  
52 care center because of asthma?”

53 Multivariable logistic regression, stratified by age, was performed to assess the  
54 relationship between food allergy and demographic and clinical characteristics. Multivariable  
55 models were adjusted for gender, race/ethnicity, education, income, allergic rhinitis, and asthma.  
56 A two-tailed p value of  $< 0.05$  was considered statistically significant.

57

58

59

60 **E1. NHANES 2007-2008 prevalence of self-reported specific food allergies**

|                   | <b>Children</b>     | <b>Adults</b>      | <b>Total Study Population</b> |
|-------------------|---------------------|--------------------|-------------------------------|
| <b>Milk</b>       | 2.39 (1.48 – 3.30)  | 2.70 (1.88 – 3.53) | 2.63 (2.03 – 3.23)            |
| <b>Shellfish</b>  | 0.77 (0.21 – 1.33)  | 2.09 (1.68 – 2.50) | 1.77 (1.47 – 2.08)            |
| <b>Peanut</b>     | 1.42 (0.90 – 1.94)  | 1.06 (0.59 – 1.53) | 1.15 (0.77 – 1.52)            |
| <b>Tree Nuts</b>  | 0.56 (0.17 – 0.96)  | 0.96 (0.48 – 1.43) | 0.86 (0.51 – 1.21)            |
| <b>Egg</b>        | 0.41 (0.07 – 0.75)  | 0.54 (0.34 – 0.75) | 0.51 (0.34 – 0.68)            |
| <b>Wheat</b>      | 0.32 (-0.01 – 0.66) | 0.74 (0.42 – 1.05) | 0.64 (0.39 – 0.89)            |
| <b>Fish</b>       | 0.53 (-0.05 – 1.10) | 0.43 (0.27 – 0.60) | 0.46 (0.27 – 0.65)            |
| <b>Soy</b>        | 0.37 (0.14 – 0.59)  | 0.34 (0.10 – 0.58) | 0.34 (0.14 – 0.55)            |
| <b>Corn</b>       | 0.51 (0.13 – 0.88)  | 0.27 (0.05 – 0.48) | 0.33 (0.13 – 0.52)            |
| <b>PN/TN</b>      | 1.65 (1.13 – 2.17)  | 1.67 (0.96 – 2.38) | 1.66 (1.11 – 2.22)            |
| <b>PN/TN/SF</b>   | 2.18 (1.50 – 2.86)  | 3.37 (2.61 – 4.13) | 3.09 (2.48 – 3.70)            |
| <b>PN/TN/SF/F</b> | 2.35 (1.61 – 3.10)  | 3.55 (2.73 – 4.37) | 3.27 (2.61 – 3.92)            |
| <b>Other</b>      | 3.22 (2.44 – 4.01)  | 4.81 (4.06 – 5.56) | 4.43 (3.85 – 5.01)            |
| <b>All Foods</b>  | 7.02 (5.73 – 8.31)  | 10.0 (8.72 – 11.4) | 9.32 (8.24 – 10.4)            |

61

Values reported as % (95% CI)

62

PN = peanut; TN = tree nuts; SF = shellfish; F = fish

63

64

65 **E2. NHANES 2009-2010 prevalence of self-reported specific food allergies**

|                   | <b>Children</b>     | <b>Adults</b>      | <b>Total Study Population</b> |
|-------------------|---------------------|--------------------|-------------------------------|
| <b>Milk</b>       | 1.49 (0.98 – 2.01)  | 2.58 (1.97 – 3.19) | 2.32 (1.81 – 2.83)            |
| <b>Shellfish</b>  | 0.96 (0.63 – 1.29)  | 1.99 (1.42 – 2.56) | 1.75 (1.27 – 2.22)            |
| <b>Peanut</b>     | 0.90 (0.43 – 1.37)  | 0.72 (0.38 – 1.06) | 0.76 (0.45 – 1.08)            |
| <b>Tree Nuts</b>  | 0.48 (0.09 – 0.87)  | 0.78 (0.51 – 1.05) | 0.71 (0.48 – 0.93)            |
| <b>Egg</b>        | 0.86 (0.55 – 1.17)  | 0.48 (0.26 – 0.69) | 0.57 (0.39 – 0.75)            |
| <b>Wheat</b>      | 0.25 (0.07 – 0.43)  | 0.51 (0.21 – 0.82) | 0.45 (0.23 – 0.67)            |
| <b>Fish</b>       | 0.33 (0.08 – 0.57)  | 0.49 (0.27 – 0.71) | 0.45 (0.31 – 0.59)            |
| <b>Soy</b>        | 0.14 (0.04 – 0.24)  | 0.36 (0.06 – 0.66) | 0.31 (0.08 – 0.54)            |
| <b>Corn</b>       | 0.06 (-0.04 – 0.17) | 0.18 (0.00 – 0.35) | 0.15 (0.01 – 0.28)            |
| <b>PN/TN</b>      | 1.20 (0.57 – 1.84)  | 1.27 (0.86 – 1.68) | 1.26 (0.84 – 1.67)            |
| <b>PN/TN/SF</b>   | 1.95 (1.30 – 2.60)  | 3.15 (2.54 – 3.76) | 2.86 (2.32 – 3.40)            |
| <b>PN/TN/SF/F</b> | 2.23 (1.50 – 2.97)  | 3.44 (2.81 – 4.07) | 3.15 (2.61 – 3.69)            |
| <b>Other</b>      | 2.44 (1.66 – 3.22)  | 4.18 (3.56 – 4.80) | 3.76 (3.24 – 4.29)            |
| <b>All Foods</b>  | 6.05 (4.83 – 7.27)  | 9.40 (8.43 – 10.4) | 8.60 (7.80 – 9.39)            |

66

Values reported as % (95% CI)

67

PN = peanut; TN = tree nuts; SF = shellfish; F = fish

68

69

70

71  
72 **Table E3: Relationship between demographic and clinical characteristics and self-reported**  
73 **food allergy\***

|                   | Children           |         | Adults             |         |
|-------------------|--------------------|---------|--------------------|---------|
|                   | OR (95% CI)        | p value | OR (95% CI)        | p value |
| Female            | 1.25 (0.73 – 1.59) | 0.08    | 1.35 (1.14 – 1.59) | 0.001   |
| Race/Ethnicity    |                    |         |                    |         |
| Caucasian         | 1 (REF)            |         | 1 (REF)            |         |
| Hispanic          | 0.94 (0.69 – 1.28) | 0.67    | 1.12 (0.89 – 1.39) | 0.32    |
| Black             | 1.31 (0.93 – 1.83) | 0.12    | 1.28 (1.06 – 1.53) | <0.01   |
| Other             | 1.54 (0.97 – 2.46) | 0.07    | 1.01 (0.63 – 1.48) | 0.94    |
| College Education | 1.12 (0.79 – 1.60) | 0.52    | 1.46 (1.18 – 1.82) | 0.001   |
| Income > 1.75 x   | 1.04 (0.84 – 1.29) | 0.70    | 1.03 (0.91 – 1.17) | 0.65    |
| PL                |                    |         |                    |         |
| Asthma            | 2.76 (2.02 – 3.75) | <0.001  | 1.87 (1.56 – 2.24) | <0.001  |
| Allergic Rhinitis | 1.85 (1.42 – 2.40) | <0.001  | 2.11 (1.71 – 2.61) | <0.001  |

74 Values reported as adjusted odds ratios (95% CI)

75 PL = poverty level

76 \* Adjusted for gender, race/ethnicity, education, income, asthma, and allergic rhinitis

77

78 **E4. Prevalence of self-reported food allergy by asthma indicator\***

|                                                     | Children           | p value | Adults             | p value | Total Study Population | p value |
|-----------------------------------------------------|--------------------|---------|--------------------|---------|------------------------|---------|
| No asthma                                           | 5.19 (4.54 – 5.92) | <0.0001 | 8.55 (7.80 – 9.36) | <0.0001 | 7.76 (7.15 – 8.42)     | <0.0001 |
| “Ever been told you have asthma?”                   | 7.40 (4.60 – 11.6) |         | 13.6 (10.7 – 17.1) |         | 12.2 (9.94 – 14.8)     |         |
| “Still have asthma?”                                | 15.2 (10.7 – 21.2) |         | 16.7 (12.8 – 21.6) |         | 16.3 (13.0 – 20.3)     |         |
| “Had asthma attack in the past year?”               | 19.9 (13.0 – 29.3) |         | 24.8 (19.0 – 31.6) |         | 23.1 (19.1 – 28.3)     |         |
| “Emergency care visit for asthma in the past year?” | 21.6 (13.9 – 32.0) |         | 19.3 (12.5 – 28.7) |         | 20.1 (14.7 – 26.9)     |         |

79 Values reported as % (95% CI)

80 \* P value obtained by test for trend

81

82

83

84

85

86

87

88

89

90

91
